# Supplementary material for: Developing a novel hybrid model for the estimation of surface 8 h ozone (O 3 ) across the remote Tibetan Plateau during 2005–2018
Source: Copernicus journal article supplement (doi:10.5194/acp-20-6159-2020), 2020-05-26
Supplement: Supplementary file 1 [file acp-20-6159-2020-supplement.pdf]

Supplement of Atmos. Chem. Phys., 20, 6159–6175, 2020  
<https://doi.org/10.5194/acp-20-6159-2020-supplement>  
© Author(s) 2020. This work is distributed under  
the Creative Commons Attribution 4.0 License.

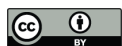

*Supplement of*

## **Developing a novel hybrid model for the estimation of surface 8 h ozone (O<sub>3</sub>) across the remote Tibetan Plateau during 2005–2018**

**Rui Li et al.**

*Correspondence to:* Hongbo Fu (fuhb@fudan.edu.cn)

The copyright of individual parts of the supplement might differ from the CC BY 4.0 License.

Number of pages: 15

Number of texts: 1

Number of figures: 11

Number of tables: 2

## Text S1

We employed three statistical indicators of the coefficient of determination ( $R^2$ ), the rootmean-square error (RMSE), and the mean prediction error (MPE) to evaluate the model performance.

These indicators are calculated as follows:

$$R^2 = \frac{\sum_{i=1}^n (pre - \bar{pre})(obs - \bar{obs})}{\sqrt{\sum_{i=1}^n (pre - \bar{pre})^2} \sqrt{\sum_{i=1}^n (obs - \bar{obs})^2}} \quad (1)$$

$$RMSE = \sqrt{\frac{\sum_{i=1}^n (pre - obs)^2}{n}} \quad (2)$$

$$MPE = \frac{\sum_{i=1}^n |pre - obs|}{n} \quad (3)$$

$$RPE = \frac{\sum_{i=1}^n |pre - obs|}{obs} \quad (4)$$

where  $pre$  represents the predictive value,  $obs$  is the observation value, and  $n$  is the total number of data records.

**Fig. S1** The names and geographical locations of prefecture-level cities in Tibetan Plateau

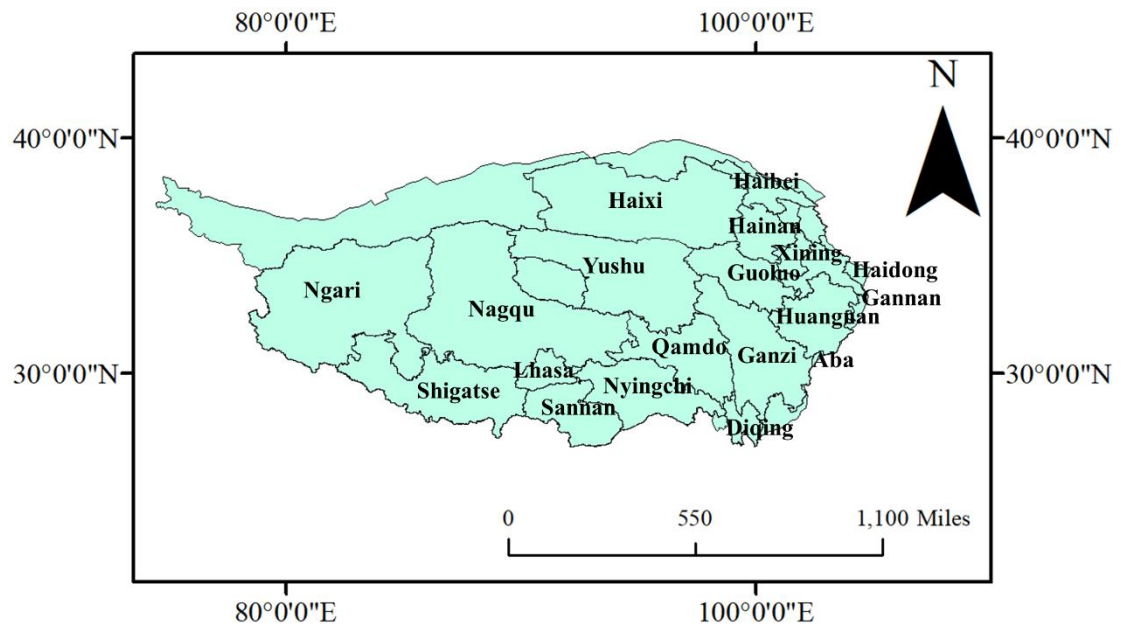

**Fig. S2** The predictive performances of GRNN (a), XGBoost (b), BPNN (c), ElmanNN (d), and ELM (e) for the 8-h O<sub>3</sub> estimation across Tibetan Plateau. The red dotted line denotes the fitting linear regression line through the data points.

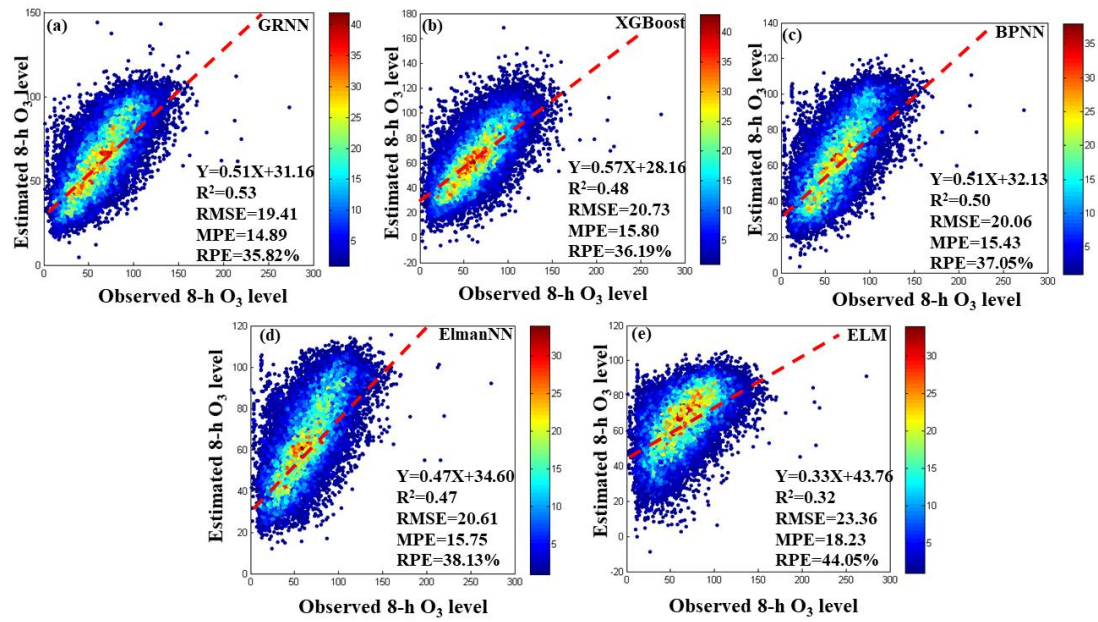

**Fig. S3** The annually mean O<sub>3</sub> column amount (Unit: DU) in Tibetan Plateau during 2005-2018.

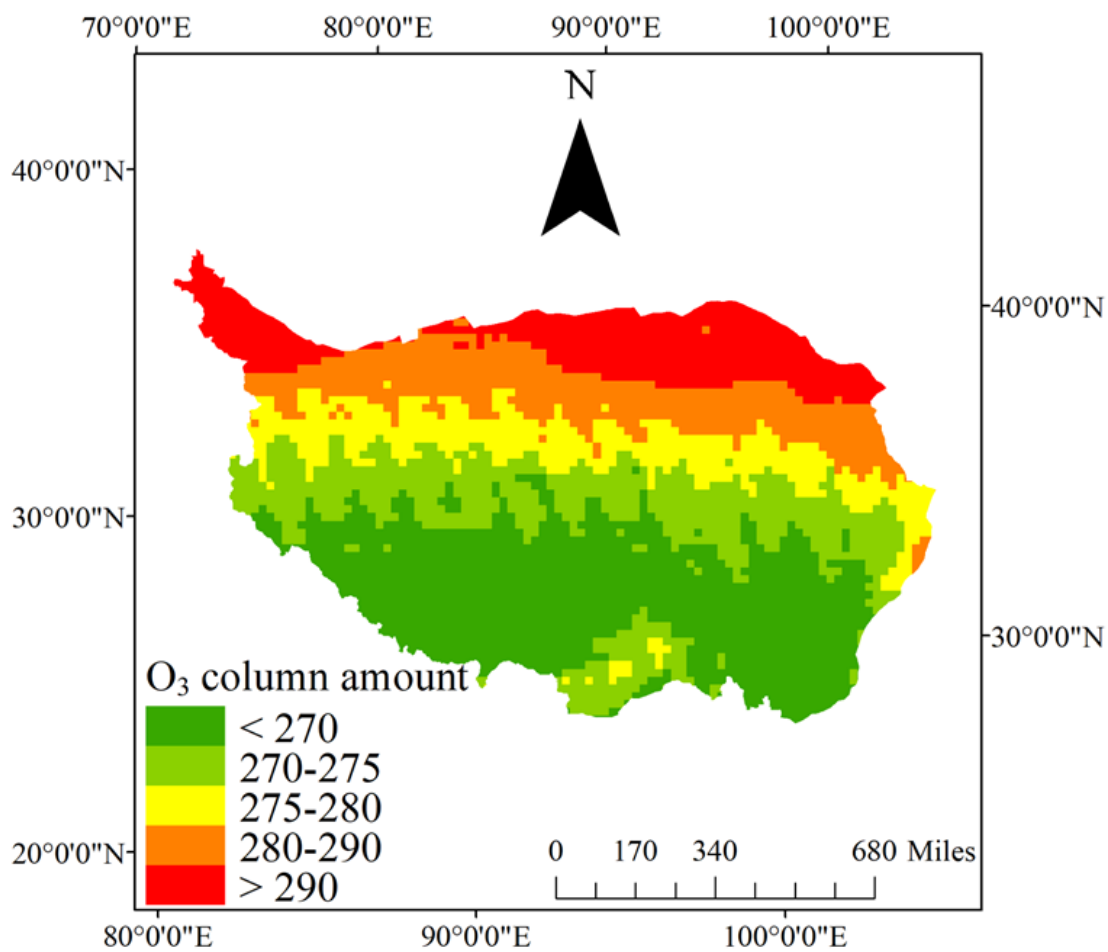

**Fig. S4** The mean VOC and NO<sub>x</sub> emissions (Unit: Mg) in Tibetan Plateau during 2005-2018.

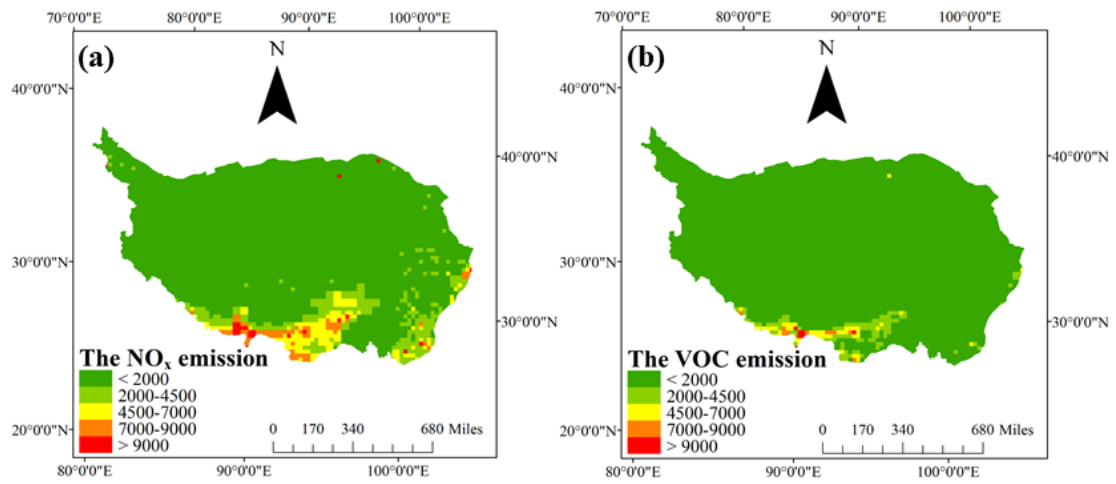

**Fig. S5** The annually mean values for key meteorological factors during 2005-2018.

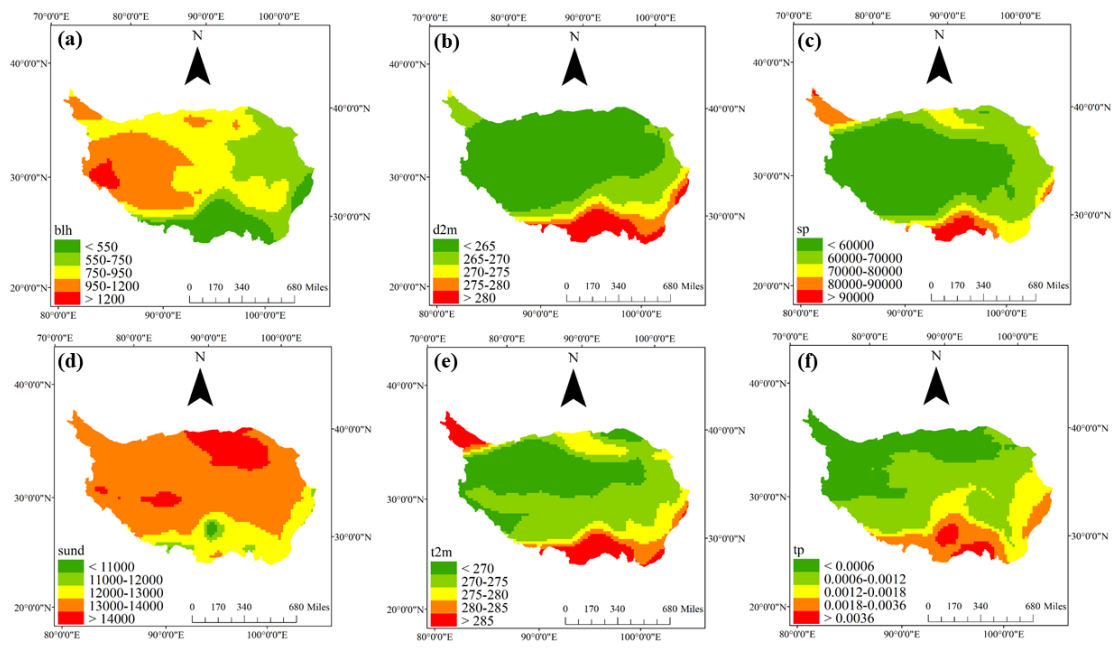



**Fig. S6** The mean values for blh in four seasons during 2005-2018.

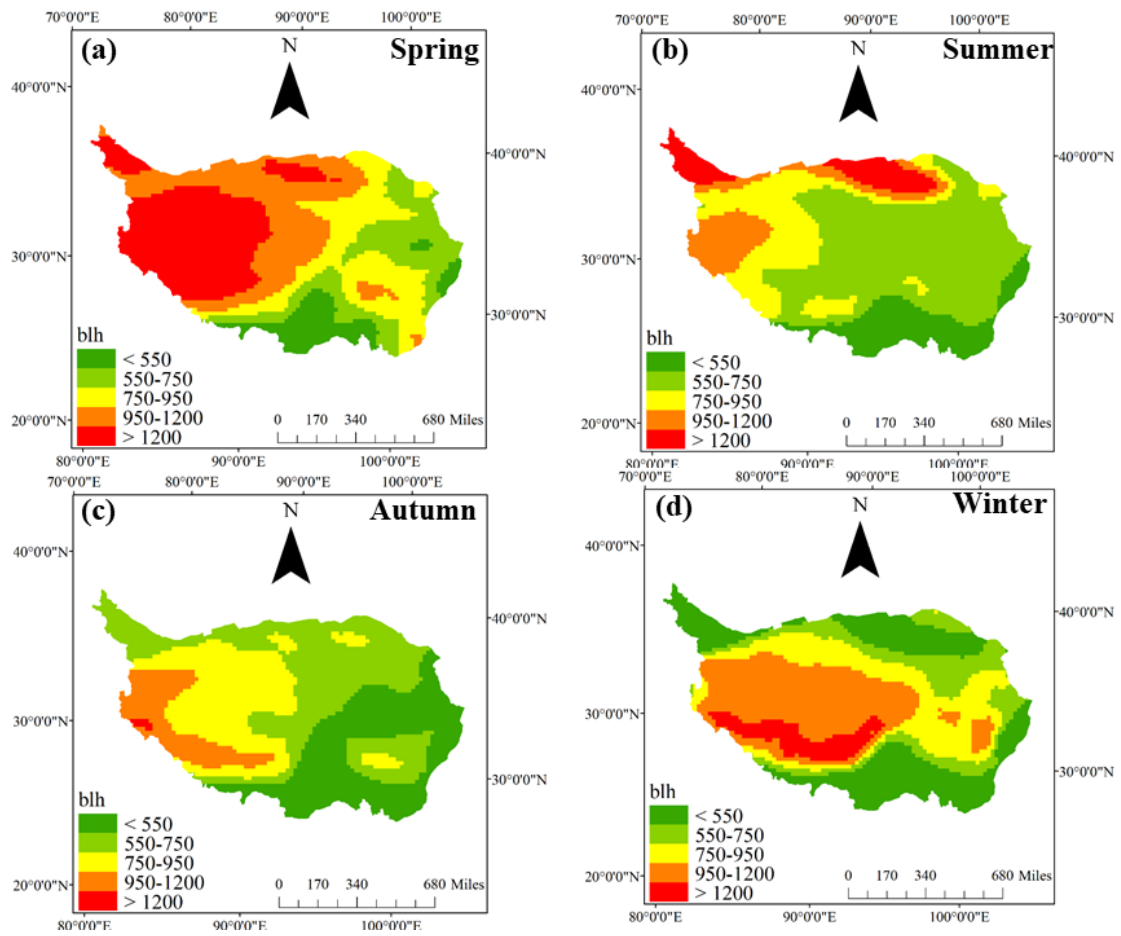

**Fig. S7** The mean values for d2m in four seasons during 2005-2018.

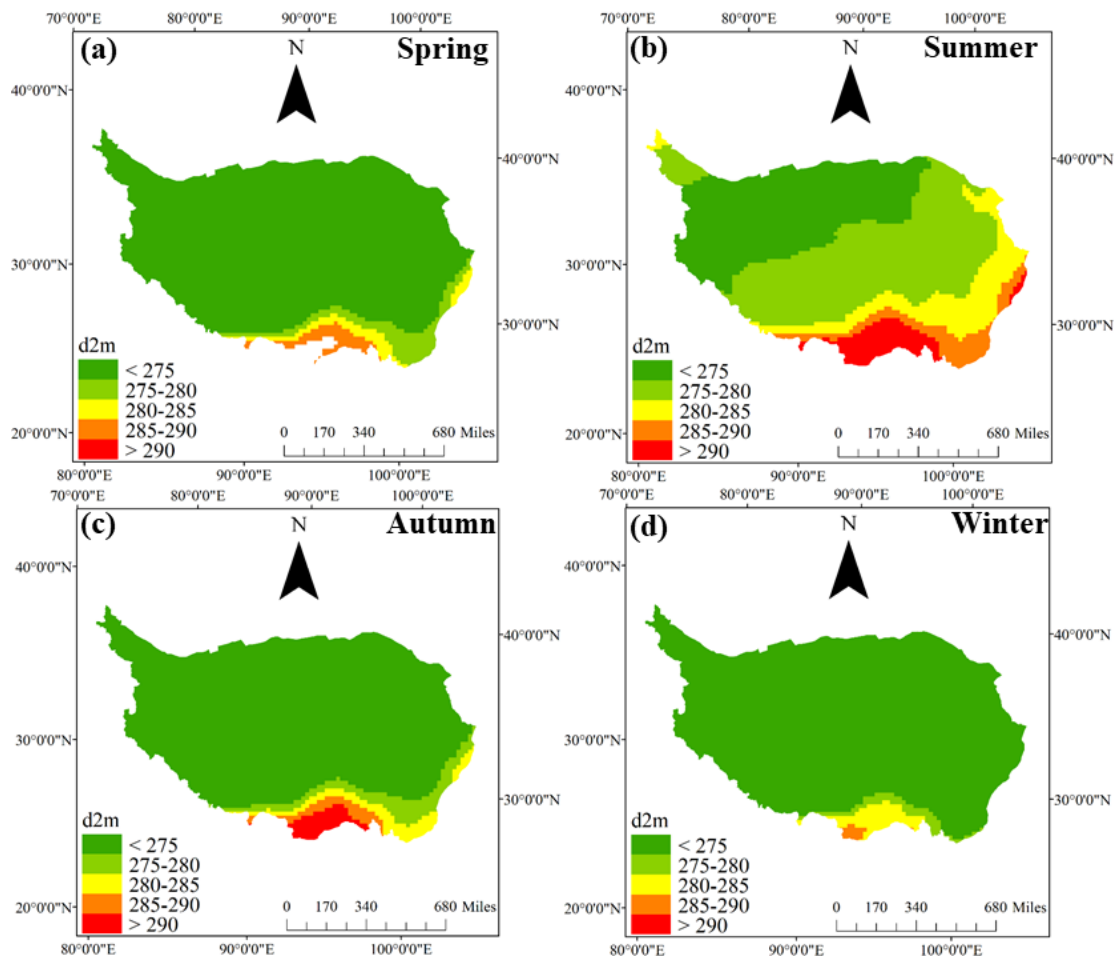

**Fig. S8** The mean values for sp in four seasons during 2005-2018.

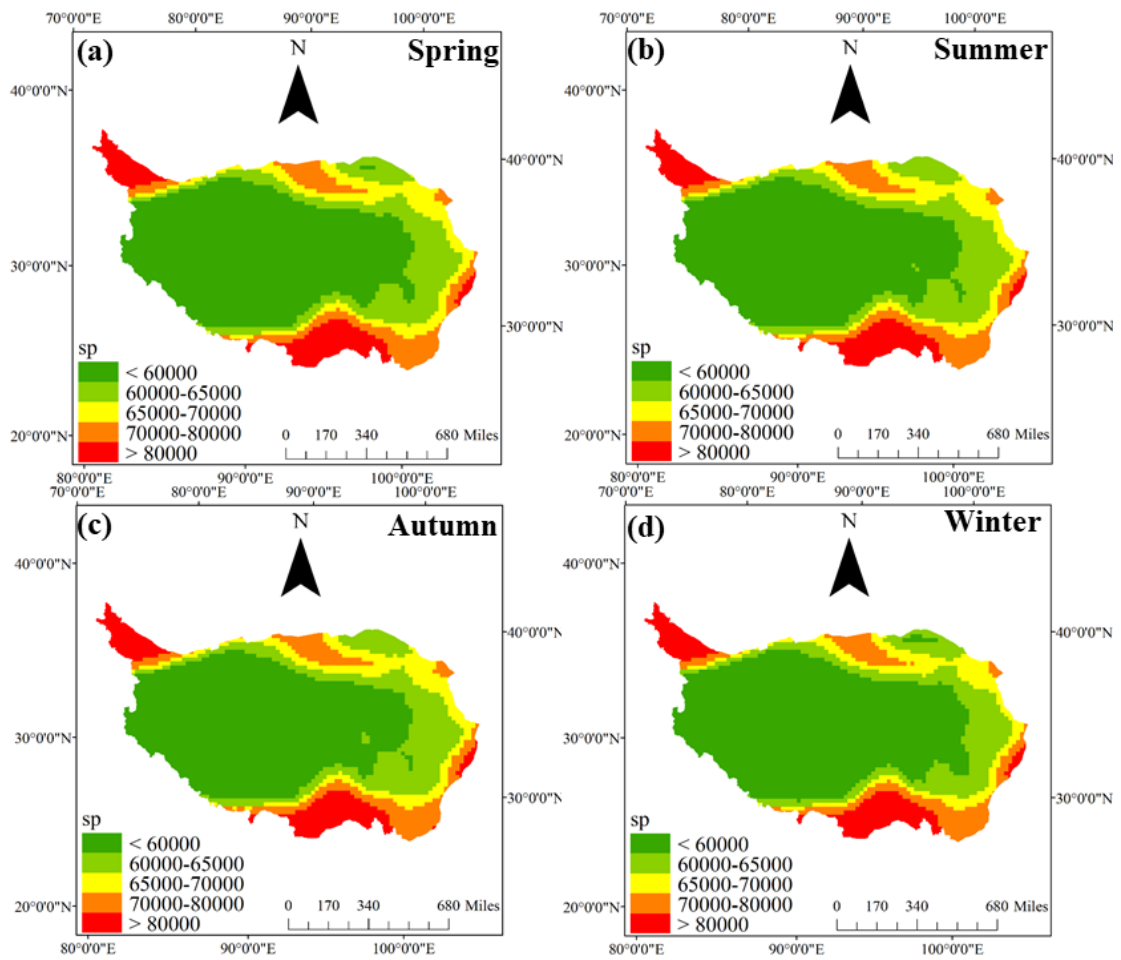

**Fig. S9** The mean values for sund in four seasons during 2005-2018.

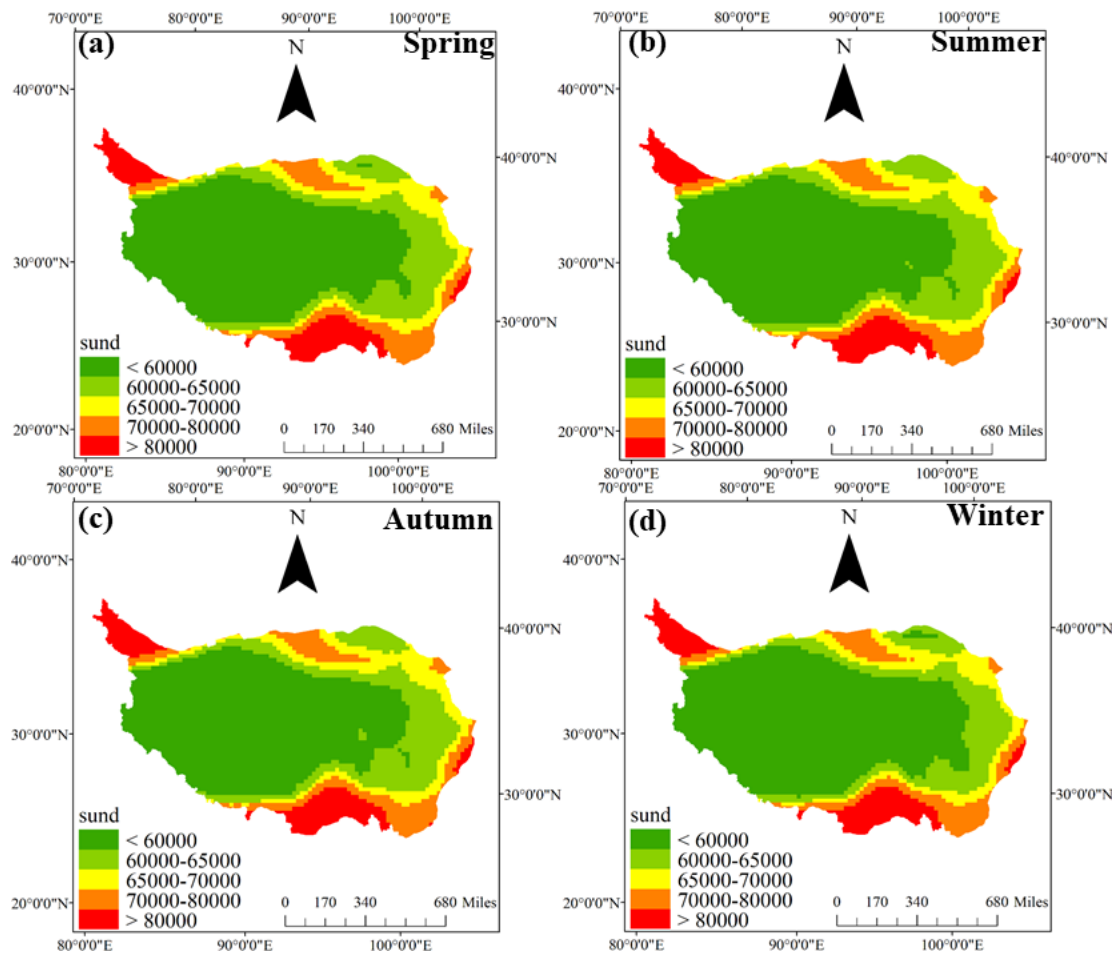

**Fig. S10** The mean values for t2m in four seasons during 2005-2018.

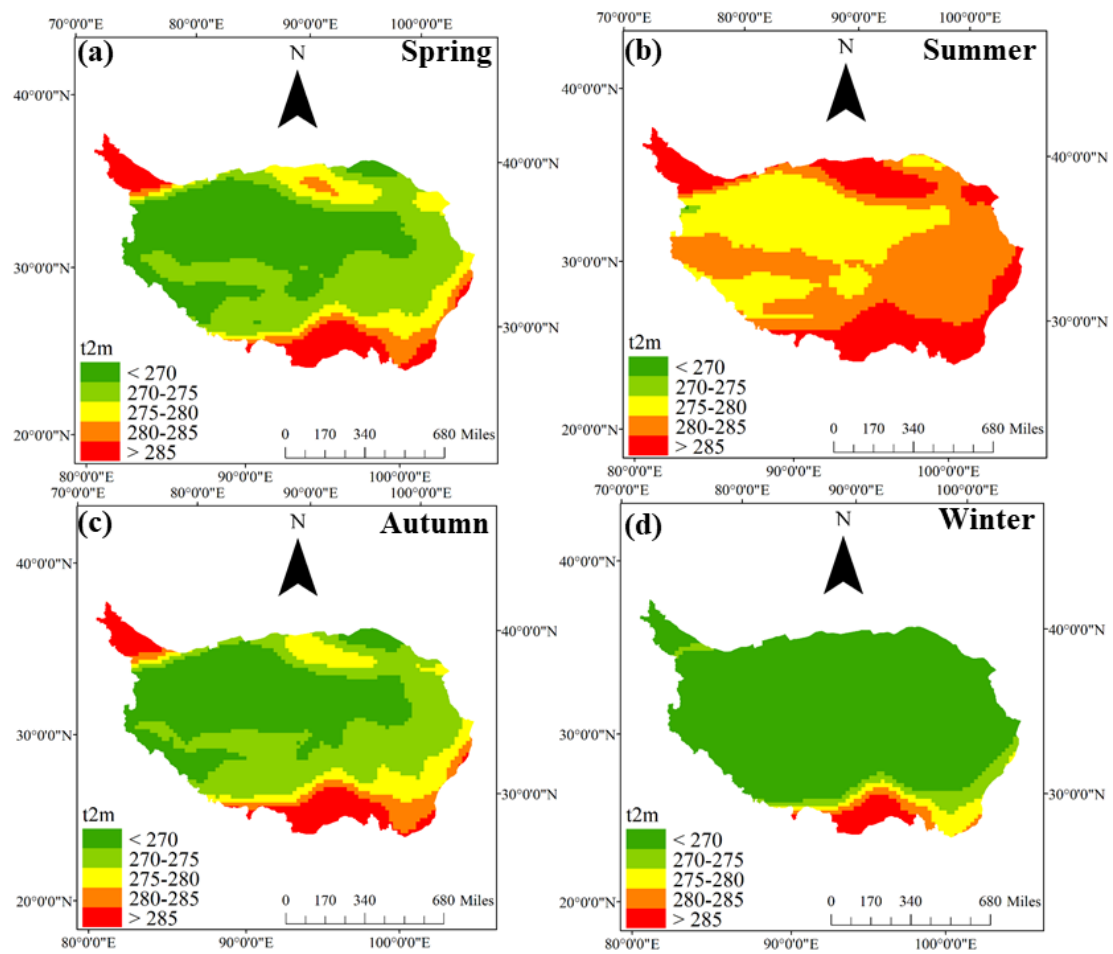

**Fig. S11** The mean values for tp in four seasons during 2005-2018.

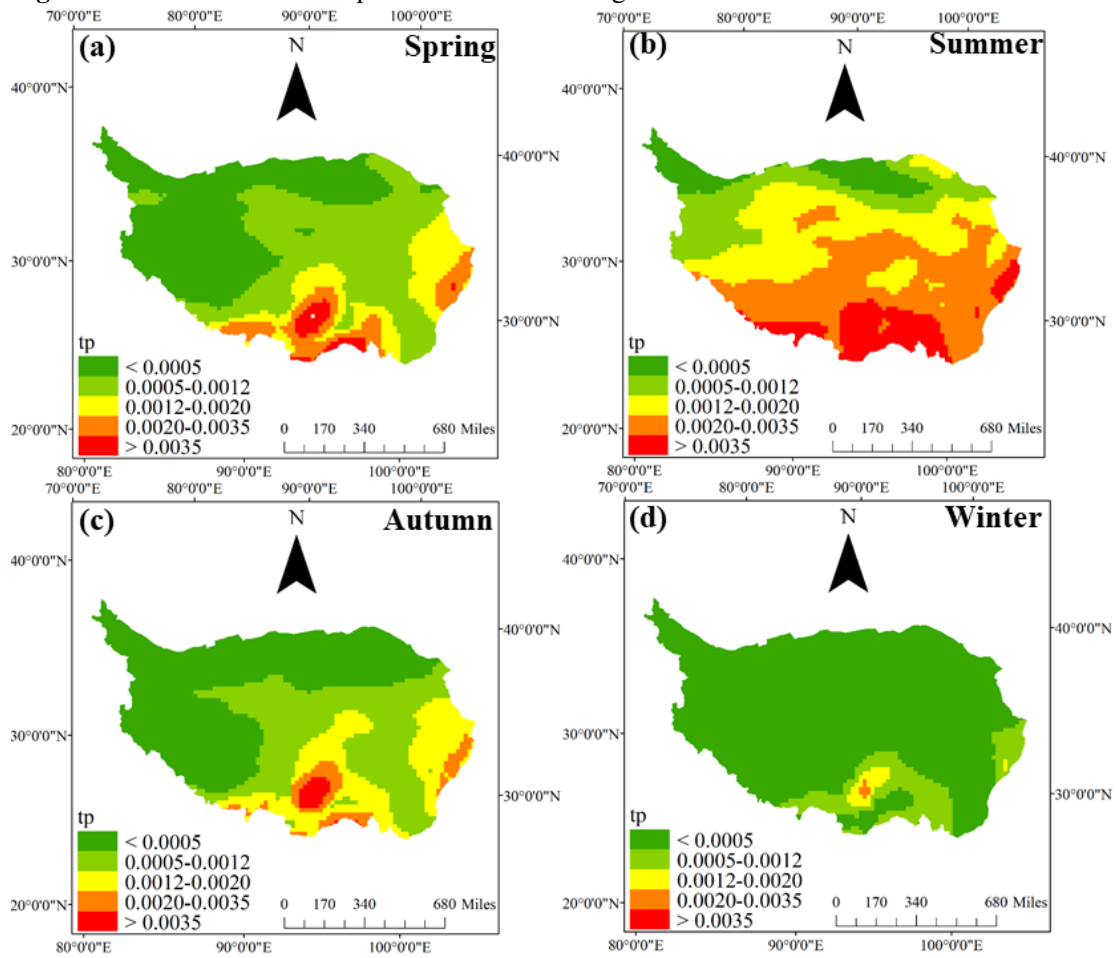

**Table S1** The temporal variation of 8-h O<sub>3</sub> concentrations and nonattainment days over Tibetan Plateau.

| Year | Annual mean 8-h O <sub>3</sub> level<br>( $\mu\text{g}/\text{m}^3$ ) | maximum nonattainment days |
|------|----------------------------------------------------------------------|----------------------------|
| 2005 | $64.74 \pm 8.30$                                                     | 92                         |
| 2006 | $64.75 \pm 8.20$                                                     | 103                        |
| 2007 | $65.17 \pm 8.23$                                                     | 80                         |
| 2008 | $64.57 \pm 8.32$                                                     | 93                         |
| 2009 | $65.15 \pm 8.26$                                                     | 85                         |
| 2010 | $65.44 \pm 8.44$                                                     | 79                         |
| 2011 | $64.47 \pm 8.44$                                                     | 70                         |
| 2012 | $64.97 \pm 8.41$                                                     | 73                         |
| 2013 | $64.96 \pm 8.48$                                                     | 70                         |
| 2014 | $65.68 \pm 8.53$                                                     | 89                         |
| 2015 | $66.45 \pm 8.67$                                                     | 95                         |
| 2016 | $64.61 \pm 8.48$                                                     | 75                         |
| 2017 | $65.27 \pm 8.65$                                                     | 89                         |
| 2018 | $65.87 \pm 8.52$                                                     | 77                         |

**Table S2** The NO<sub>x</sub> and VOC emissions (Unit: Mg) in four seasons over Tibetan Plateau

|                 | Spring      | Summer      | Autumn      | Winter      |
|-----------------|-------------|-------------|-------------|-------------|
| NO <sub>x</sub> | 92.74±5.52  | 90.69±5.21  | 91.64±5.34  | 95.24±5.65  |
| VOC             | 207.21±6.44 | 206.15±6.46 | 207.16±6.46 | 219.99±6.55 |
